# Supplementary material for: Candidate Gene Identification with SNP Marker-Based Fine Mapping of Anthracnose Resistance Gene Co-4 in Common Bean
Source: PubMed Central journal article supplement (PMC4592015; doi:10.1371/journal.pone.0139450), 2015-10-02
Supplement: pone.0139450.s007.pdf [file pone.0139450.s007.pdf]

Supplementary Table S1

| <b>Annotated Gene</b> | <b>Genomic Sequence Length</b> | <b>Predicted functional annotation</b>                |
|-----------------------|--------------------------------|-------------------------------------------------------|
| Phvul.008G004500      | 3688                           | Chaparonin containing T-complex protein               |
| Phvul.008G004600      | 1863                           | Carboxylesterase related                              |
| Phvul.008G004700      | 35676                          | Uncharacterized protein                               |
| Phvul.008G004800      | 5740                           | Flavodoxin related                                    |
| Phvul.008G004900      | 2132                           | Uncharacterized protein                               |
| Phvul.008G005000      | 1845                           | Uncharacterized protein                               |
| Phvul.008G005100      | 935                            | Ribosomal protein                                     |
| Phvul.008G005200      | 2068                           | Uncharacterized protein                               |
| Phvul.008G005300      | 1696                           | Cytokinin synthase                                    |
| Phvul.008G005400      | 2224                           | Ribosomal protein                                     |
| Phvul.008G005500      | 1527                           | Uncharacterized protein                               |
| Phvul.008G005600      | 4380                           | Cytochrome P450                                       |
| Phvul.008G005700      | 3606                           | Transporter family                                    |
| Phvul.008G005800      | 2340                           | Uncharacterized protein                               |
| Phvul.008G005900      | 3253                           | Uncharacterized protein                               |
| Phvul.008G006000      | 1126                           | Uncharacterized protein                               |
| Phvul.008G006100      | 3478                           | Chloride Peroxidase                                   |
| Phvul.008G006200      | 4346                           | Mannose-6-phosphate isomerase                         |
| Phvul.008G006300      | 1002                           | Uncharacterized protein                               |
| Phvul.008G006400      | 9321                           | Uncharacterized protein                               |
| Phvul.008G006500      | 6328                           | U1 small nuclear ribonucleoprotein                    |
| Phvul.008G006600      | 1674                           | Uncharacterized protein                               |
| Phvul.008G006700      | 3661                           | rRNA processing protein RRP7                          |
| Phvul.008G006800      | 6629                           | Ribosome Assembly protein                             |
| Phvul.008G006900      | 1595                           | Uncharacterized protein                               |
| Phvul.008G007000      | 268                            | Uncharacterized protein                               |
| Phvul.008G007100      | 4968                           | Phosphatidylinositol N-acetylglucosaminyl transferase |
| Phvul.008G007200      | 926                            | Uncharacterized protein                               |
| Phvul.008G007300      | 4066                           | Peptidyl-tRNA hydrolase                               |
| Phvul.008G007400      | 1338                           | Uncharacterized protein                               |
| Phvul.008G007500      | 6254                           | transmembrane transport                               |
| Phvul.008G007600      | 1995                           | Multitransmembrane protein                            |
| Phvul.008G007700      | 6380                           | RNA binding                                           |
| Phvul.008G007800      | 435                            | Uncharacterized protein                               |
| Phvul.008G007900      | 7911                           | Hypothetical protein                                  |
| Phvul.008G008000      | 774                            | Uncharacterized protein                               |
| Phvul.008G008100      | 2177                           | hydrolase activity                                    |
| Phvul.008G008200      | 861                            | Protease inhibitor/seed storage                       |

|                  |       |                                                         |
|------------------|-------|---------------------------------------------------------|
| Phvul.008G008300 | 9036  | protein binding                                         |
| Phvul.008G008400 | 2560  | Uncharacterized protein                                 |
| Phvul.008G008500 | 4007  | catalytic activity                                      |
| Phvul.008G008600 | 393   | Uncharacterized protein                                 |
| Phvul.008G008700 | 402   | Uncharacterized protein                                 |
| Phvul.008G008800 | 595   | Uncharacterized protein                                 |
| Phvul.008G008900 | 3059  | Histone like transcription factor                       |
| Phvul.008G009000 | 4476  | Uncharacterized membrane protein, predicted efflux pump |
| Phvul.008G009100 | 3320  | Uncharacterized protein                                 |
| Phvul.008G009200 | 13477 | ATP-dependent DNA ligase                                |
| Phvul.008G009300 | 4488  | protein methyltransferase activity                      |
| Phvul.008G009400 | 4043  | protein folding                                         |
| Phvul.008G009500 | 692   | Uncharacterized protein                                 |
| Phvul.008G009600 | 2641  | Translation initiation factor 5 (eIF-5)                 |
| Phvul.008G009700 | 3151  | Translation initiation factor 5 (eIF-5)                 |
| Phvul.008G009800 | 2038  | Membrane associated ring finger                         |
| Phvul.008G009900 | 2717  | Uncharacterized protein                                 |
| Phvul.008G010000 | 3002  | ATP-dependent Clp protease, proteolytic subunit         |
| Phvul.008G010100 | 7158  | Phenylalanyl-tRNA synthetase                            |
| Phvul.008G010200 | 1640  | Copper chaperone                                        |
| Phvul.008G010300 | 2401  | Uncharacterized protein                                 |
| Phvul.008G010400 | 804   | Uncharacterized protein                                 |
| Phvul.008G010500 | 393   | Uncharacterized protein                                 |
| Phvul.008G010600 | 2256  | hydrolase activity, hydrolyzing O-glycosyl compounds    |
| Phvul.008G010700 | 2339  | Uncharacterized protein                                 |
| Phvul.008G010800 | 5230  | Glucosyl transferase                                    |
| Phvul.008G010900 | 2885  | phospholipid binding                                    |
| Phvul.008G011000 | 3622  | Actin and related proteins                              |
| Phvul.008G011100 | 841   | Uncharacterized protein                                 |
| Phvul.008G011200 | 2999  | Uncharacterized protein                                 |
| Phvul.008G011300 | 1910  | ATP binding                                             |
| Phvul.008G011400 | 2719  | ATP binding                                             |
| Phvul.008G011500 | 723   | protein-disulfide reductase activity                    |
| Phvul.008G011600 | 2706  | ATP binding                                             |
| Phvul.008G011700 | 797   | Transmembrane transport                                 |
| Phvul.008G011800 | 1587  | protein-disulfide reductase activity                    |
| Phvul.008G011900 | 2705  | ATP binding                                             |
| Phvul.008G012000 | 584   | Uncharacterized protein                                 |
| Phvul.008G012100 | 7942  | transcription initiation factor TFIID subunit 6         |
| Phvul.008G012200 | 1553  | Uncharacterized protein                                 |
| Phvul.008G012300 | 4261  | Uncharacterized protein                                 |
| Phvul.008G012400 | 4265  | RNA binding                                             |
| Phvul.008G012500 | 1813  | DNA binding                                             |

|                  |       |                                                               |
|------------------|-------|---------------------------------------------------------------|
| Phvul.008G012600 | 2930  | ATP binding                                                   |
| Phvul.008G012700 | 4192  | Uncharacterized protein                                       |
| Phvul.008G012800 | 5269  | Protein geranylgeranyltransferase Type I, beta subunit        |
| Phvul.008G012900 | 2015  | Uncharacterized protein                                       |
| Phvul.008G013000 | 2996  | ATP binding                                                   |
| Phvul.008G013100 | 4158  | Uncharacterized protein                                       |
| Phvul.008G013200 | 918   | catalytic activity                                            |
| Phvul.008G013300 | 3454  | Subtilisin-like propeptase                                    |
| Phvul.008G013400 | 8299  | Phospholipase D                                               |
| Phvul.008G013500 | 18529 | Uncharacterized protein                                       |
| Phvul.008G013600 | 2606  | RNA and export factor binding protein                         |
| Phvul.008G013700 | 9905  | Putative zinc-finger domain                                   |
| Phvul.008G013800 | 855   | DNA repair protein RHP57                                      |
| Phvul.008G013900 | 2646  | Uncharacterized protein                                       |
| Phvul.008G014000 | 5278  | regulation of transcription, DNA-dependent                    |
| Phvul.008G014100 | 255   | Uncharacterized protein                                       |
| Phvul.008G014200 | 4620  | Uncharacterized protein                                       |
| Phvul.008G014300 | 4420  | Ras-related protein Rab-8A                                    |
| Phvul.008G014400 | 6977  | 2-Oxoglutarate dehydrogenase                                  |
| Phvul.008G014500 | 6055  | Uncharacterized protein                                       |
| Phvul.008G014600 | 633   | Uncharacterized protein                                       |
| Phvul.008G014700 | 3040  | Uncharacterized protein                                       |
| Phvul.008G014800 | 2170  | F-box domain                                                  |
| Phvul.008G014900 | 2054  | Aquaporin Transporter                                         |
| Phvul.008G015000 | 9610  | Peptide exporter, ABC superfamily                             |
| Phvul.008G015100 | 2443  | Hypothetical protein                                          |
| Phvul.008G015200 | 1651  | large subunit ribosomal protein                               |
| Phvul.008G015300 | 5185  | Hypothetical protein                                          |
| Phvul.008G015400 | 8085  | Beta-N-acetylhexosaminidase                                   |
| Phvul.008G015500 | 4168  | Cation Efflux Protein/ Zinc Transporter                       |
| Phvul.008G015600 | 8282  | Sulfate Transporter                                           |
| Phvul.008G015700 | 2441  | Hypothetical protein                                          |
| Phvul.008G015800 | 2184  | Hypothetical protein                                          |
| Phvul.008G015900 | 1711  | Plant protein 1589 of unknown function                        |
| Phvul.008G016000 | 4563  | Uncharacterized protein                                       |
| Phvul.008G016100 | 2497  | Hypothetical protein                                          |
| Phvul.008G016200 | 609   | Uncharacterized protein                                       |
| Phvul.008G016300 | 404   | Short sequence                                                |
| Phvul.008G016400 | 402   | Short sequence                                                |
| Phvul.008G016500 | 1233  | IQ calmodulin-binding motif                                   |
| Phvul.008G016600 | 1274  | IQ calmodulin-binding motif                                   |
| Phvul.008G016700 | 4544  | Amidohydrolase                                                |
| Phvul.008G016800 | 3012  | TRNA-nucleotidyl transferase/poly(A) polymerase family member |

|                  |       |                                                                          |
|------------------|-------|--------------------------------------------------------------------------|
| Phvul.008G016900 | 4692  | Glucose-6-phosphate dehydrogenase                                        |
| Phvul.008G017000 | 2957  | OTU-like cysteine protease                                               |
| Phvul.008G017100 | 2733  | Uncharacterized protein                                                  |
| Phvul.008G017200 | 6392  | Sphinganine-1-phosphate aldolase                                         |
| Phvul.008G017300 | 4363  | Eukaryotic translation initiation factor 3 related                       |
| Phvul.008G017400 | 3815  | Uncharacterized protein                                                  |
| Phvul.008G017500 | 5256  | G-protein beta subunit-like protein                                      |
| Phvul.008G017600 | 8122  | Uncharacterized conserved protein                                        |
| Phvul.008G017700 | 6493  | Protein of unknown function                                              |
| Phvul.008G017800 | 4608  | Aldo/Keto reductase                                                      |
| Phvul.008G017900 | 1578  | Exotosin (Heparan sulfate glycosyl transferase) - related                |
| Phvul.008G018000 | 1794  | P21-Rho-binding domain                                                   |
| Phvul.008G018100 | 3548  | Chitinase related                                                        |
| Phvul.008G018200 | 5065  | Protein phosphatase 2C delta                                             |
| Phvul.008G018300 | 11097 | Chloroplast nucleiod DNA binding related                                 |
| Phvul.008G018400 | 15651 | RNA-binding protein 7,8                                                  |
| Phvul.008G018500 | 12514 | PHD Finger protein                                                       |
| Phvul.008G018600 | 336   | Protein binding domain                                                   |
| Phvul.008G018700 | 1707  | Nucleoporin related                                                      |
| Phvul.008G018800 | 8723  | Ring finger protein                                                      |
| Phvul.008G018900 | 1193  | Uncharacterized protein                                                  |
| Phvul.008G019000 | 6507  | RNA polymerase                                                           |
| Phvul.008G019100 | 3579  | Serine carboxypeptidase II                                               |
| Phvul.008G019200 | 2925  | Hypothetical protein                                                     |
| Phvul.008G019300 | 9468  | GCN-4 Complementing protein                                              |
| Phvul.008G019400 | 4047  | Uncharacterized protein                                                  |
| Phvul.008G019500 | 8292  | Protein Mei 2, essential for commitment to meiosis, and related proteins |
| Phvul.008G019600 | 4754  | Hypothetical protein                                                     |
| Phvul.008G019700 | 3049  | N-Terminal Acetyl transferase                                            |
| Phvul.008G019800 | 1642  | Ribosomal protein L30                                                    |
| Phvul.008G019900 | 1113  | Hypothetical protein                                                     |
| Phvul.008G020000 | 2359  | DNA-Directed RNA Polymerase                                              |
| Phvul.008G020100 | 3561  | Uncharacterized protein                                                  |
| Phvul.008G020200 | 2030  | Allene oxide cyclase                                                     |
| Phvul.008G020300 | 1287  | Uncharactrized protein                                                   |
| Phvul.008G020400 | 2066  | TCP family transcription factor                                          |
| Phvul.008G020500 | 5877  | Translation initiation factor eIF-2B subunit                             |
| Phvul.008G020600 | 6888  | Transcription factor                                                     |
| Phvul.008G020700 | 4330  | Hypothetical Protein                                                     |
| Phvul.008G020800 | 2503  | Oligopeptide Transporter related                                         |
| Phvul.008G020900 | 1376  | NB-ARC domain                                                            |
| Phvul.008G021100 | 2187  | Hypothetical protein                                                     |
| Phvul.008G021200 | 5075  | Uncharactrized protein                                                   |

|                  |       |                                                                                |
|------------------|-------|--------------------------------------------------------------------------------|
| Phvul.008G021300 | 659   | Uncharacterized protein                                                        |
| Phvul.008G021400 | 6624  | Hypothetical protein                                                           |
| Phvul.008G021500 | 9993  | Tetratricopeptide repeat                                                       |
| Phvul.008G021600 | 4658  | Uncharacterized protein                                                        |
| Phvul.008G021700 | 2573  | RNA POLYMERASE III (DNA DIRECTED), 39KD SUBUNIT-RELATED                        |
| Phvul.008G021800 | 804   | Hypothetical protein                                                           |
| Phvul.008G021900 | 3276  | protein YIF1B-like                                                             |
| Phvul.008G022000 | 3006  | proline dehydrogenase 2                                                        |
| Phvul.008G022100 | 2557  | S-adenosylmethionine decarboxylase                                             |
| Phvul.008G022200 | 234   | short sequence (153 bp)                                                        |
| Phvul.008G022300 | 1162  | Short sequence (192 nt)                                                        |
| Phvul.008G022400 | 1066  | short seq (228 nt) - zinc finger protein                                       |
| Phvul.008G022500 | 1209  | short-chain dehydrogenase reductase 2a-like                                    |
| Phvul.008G022600 | 2248  | pentatricopeptide repeat-containing protein                                    |
| Phvul.008G022800 | 2687  | Zinc finger protein                                                            |
| Phvul.008G022900 | 2246  | Uncharacterized protein/Ribosomal protein                                      |
| Phvul.008G023000 | 2420  | Ribosomal or hypothetical proteins                                             |
| Phvul.008G023100 | 502   | short seq (255 nt) - self-incompatibility response (SCRL) protein              |
| Phvul.008G023200 | 623   | short sequence (255)                                                           |
| Phvul.008G023300 | 513   | short sequence                                                                 |
| Phvul.008G023400 | 918   | Uncharacterized protein                                                        |
| Phvul.008G023500 | 782   | Uncharacterized protein                                                        |
| Phvul.008G023600 | 449   | Uncharacterized protein                                                        |
| Phvul.008G023700 | 2768  | 6-phosphogluconate dehydrogenase (GND), transcript variant                     |
| Phvul.008G023800 | 864   | bZIP transcription factor                                                      |
| Phvul.008G023900 | 3530  | pentatricopeptide repeat-containing protein                                    |
| Phvul.008G024000 | 4999  | WPP domain-interacting tail-anchored protein                                   |
| Phvul.008G024100 | 3594  | sodium-coupled neutral amino acid transporter 1                                |
| Phvul.008G024200 | 1680  | Uncharacterized protein                                                        |
| Phvul.008G024300 | 3496  | pentatricopeptide repeat-containing protein                                    |
| Phvul.008G024400 | 3959  | pentatricopeptide repeat-containing protein                                    |
| Phvul.008G024500 | 8093  | Glycine max kanadaplin-like (LOC100778453), transcript variant X2,<br>misc_RNA |
| Phvul.008G024600 | 12414 | Glycine max DNA-directed RNA polymerase 2B, chloroplastic/mitochondrial-like   |
| Phvul.008G024700 | 1201  | Hypothetical protein                                                           |
| Phvul.008G024800 | 3756  | Uncharacterized protein                                                        |
| Phvul.008G024900 | 1443  | Hypothetical protein                                                           |
| Phvul.008G025000 | 2426  | F-box/kelch-repeat protein                                                     |
| Phvul.008G025100 | 1788  | Uncharacterized protein                                                        |
| Phvul.008G025400 | 5399  | Uncharacterized protein                                                        |
| Phvul.008G025500 | 3681  | Glycine max transcription factor BIM1-like (LOC100791730), mRNA                |
| Phvul.008G025600 | 3525  | Uncharacterized protein/hypothetical protein                                   |

|                  |       |                                                                                |
|------------------|-------|--------------------------------------------------------------------------------|
| Phvul.008G025700 | 21182 | Auxin transporter protein?? Zinc finger type protein                           |
| Phvul.008G025800 | 4018  | Hypothetical protein                                                           |
| Phvul.008G025900 | 2431  | pentatricopeptide repeat-containing protein                                    |
| Phvul.008G026000 | 1971  | Hypothetical protein                                                           |
| Phvul.008G026100 | 4102  | UDP-glycosyltransferase 73C3-like                                              |
| Phvul.008G026200 | 1727  | Uncharacterized protein                                                        |
| Phvul.008G026300 | 1435  | Glycine max proline-rich extensin-like protein EPR1-like mRNA                  |
| Phvul.008G026400 | 9074  | Hypothetical / uncharacterized proteins                                        |
| Phvul.008G026500 | 4733  | Glycine max E3 ubiquitin-protein ligase                                        |
| Phvul.008G026800 | 1953  | Hypothetical protein                                                           |
| Phvul.008G027000 | 3109  | Uncharacterized protein                                                        |
| Phvul.008G027400 | 759   | Hypothetical protein                                                           |
| Phvul.008G027500 | 6363  | ubiquitin-protein ligase                                                       |
| Phvul.008G027600 | 2148  | Hypothetical protein                                                           |
| Phvul.008G027700 | 5181  | Glycine max probable E3 ubiquitin-protein ligase HERC2-like transcript variant |
| Phvul.008G027800 | 7918  | MADS-box protein                                                               |
| Phvul.008G027900 | 6061  | Developmental protein                                                          |
| Phvul.008G028000 | 1734  | transcription factor MYB59-like                                                |
| Phvul.008G028100 | 2760  | Hypothetical protein                                                           |
| Phvul.008G028700 | 986   | Uncharacterized protein                                                        |
| Phvul.008G028800 | 4357  | Cytochrome Proteins                                                            |
| Phvul.008G028900 | 2448  | alpha 1,4 glucan protein synthase                                              |
| Phvul.008G029000 | 2368  | Glycine max COBRA-like protein 4-like transcript variant X1, misc_RNA          |
| Phvul.008G029100 | 3704  | protein COBRA-like                                                             |
| Phvul.008G029200 | 3521  | protein COBRA-like                                                             |
| Phvul.008G029300 | 5004  | Predicted mitochondrial carrier protein                                        |
| Phvul.008G029400 | 1630  | Uncharacterized protein                                                        |
| Phvul.008G030000 | 1127  | Hypothetical protein                                                           |
| Phvul.008G030300 | 655   | Hypothetical protein                                                           |
| Phvul.008G030500 | 2702  | Hypothetical protein                                                           |
| Phvul.008G030600 | 1146  | xylosyltransferase 2-like/B-1-3-galactosyl-o-glycosyl-glycoprotein             |
| Phvul.008G030900 | 683   | Hypothetical protein                                                           |
| Phvul.008G031400 | 5771  | ALPHA/BETA HYDROLASE FOLD-CONTAINING PROTEIN                                   |
| Phvul.008G031500 | 5463  | Glycine max ubiquitin-like domain-containing CTD phosphatase 1-like            |
| Phvul.008G031600 | 8146  | Uncharacterized protein                                                        |
| Phvul.008G031700 | 2173  | Hypothetical protein                                                           |
| Phvul.008G031800 | 1663  | Calmodulin binding proteins                                                    |
| Phvul.008G031900 | 1473  | phenolic glucoside malonyltransferase 2                                        |
| Phvul.008G032000 | 2052  | phenolic glucoside malonyltransferase                                          |
| Phvul.008G032100 | 1676  | Glycine max phenolic glucoside malonyltransferase 1-like mRNA                  |
| Phvul.008G032200 | 1685  | phenolic glucoside malonyltransferase 1-like                                   |
| Phvul.008G032300 | 1567  | Hypothetical protein                                                           |

|                  |       |                                                                              |
|------------------|-------|------------------------------------------------------------------------------|
| Phvul.008G032400 | 1452  | Glycine max phenolic glucoside malonyltransferase 1-like mRNA                |
| Phvul.008G032500 | 1217  | Hypothetical protein                                                         |
| Phvul.008G032600 | 2652  | Glycine max isoflavone 7-O-methyltransferase-like                            |
| Phvul.008G032700 | 1544  | isoflavone 7-O-methyltransferase-like                                        |
| Phvul.008G032800 | 10203 | ras GTPase-activating protein-binding protein 2-like transcript variant mRNA |
| Phvul.008G032900 | 3337  | PREDICTED: Glycine max ninja-family protein AFP2-like mRNA                   |
| Phvul.008G033300 | 5609  | Glycine max serine carboxypeptidase-like 25-like transcript variant mRNA     |
| Phvul.008G033400 | 2735  | Exocyst complex component                                                    |
| Phvul.008G033500 | 3079  | Glycine rich RNA binding proteins                                            |
| Phvul.008G033600 | 9750  | protein RIK-like (LOC100806616), transcript variant                          |
| Phvul.008G033700 | 971   | Histone H3                                                                   |
| Phvul.008G033800 | 11298 | Uncharacterized protein                                                      |
| Phvul.008G033900 | 2198  | Hypothetical protein/RNA splicing protein                                    |
| Phvul.008G034000 | 1108  | Glycosyltransferase                                                          |

---
